1 Exploring perceptions of and attitudes towards tanning with school children,  
2 parents/carers and educators in Wales: A mixed methods study protocol for the  
3 SunChat study.

4 Gisselle Tur Porres<sup>1\*</sup>, Kirsty Lanyon<sup>2</sup>, Rachel Abbott<sup>3</sup>, Helen Lewis<sup>1</sup>, Emily Marchant<sup>1</sup>, Julie Peconi<sup>2</sup>

5 <sup>1</sup>Department of Education and Childhood Studies, School of Social Sciences, Faculty of  
6 Humanities and Social Sciences, Swansea University, Wales

7 <sup>2</sup>Swansea Trials Unit, Faculty of Medicine, Health and Life Science, Swansea University, Wales

8 <sup>3</sup>Cardiff and Vale University Health Board and Skin Cancer Prevention Lead for Wales

9 \* [j.peconi@swansea.ac.uk](mailto:j.peconi@swansea.ac.uk)

## 10 **Abstract**

11

## 12 **Background**

13 Skin cancer comprises half of all cancers in England and Wales. Most skin cancers can be  
14 prevented with safer sun exposure. As over exposure as a child can greatly increase future skin  
15 cancer risk, early and accessible sun safe education and promotion of sun safe behaviours is  
16 critical. Scientists agree there is no such thing as a ‘safe tan’, yet the public, including children, often  
17 have positive perceptions of tanned skin. To protect against future skin cancer, it is important to  
18 understand and address these misconceptions. The Curriculum for Wales with its area for Health and  
19 Well-being, and autonomy for schools in designing curriculum content, presents an ideal way to  
20 facilitate this exploration.

## 21 **Aims**

- 22 • Gather data regarding perceptions towards tanning to explore the perceived effects of a tan  
23 on health.
- 24 • Inform the development and testing of a pilot toolkit for integration within the Curriculum for  
25 Wales to encourage positive health behaviours and attitudes of school children towards  
26 tanning and sun exposure.

## 27 **Methods**

28 SunChat is a mixed methods exploratory study comprising three work streams:

- 29 1. Workshops with school children to understand their perceptions on tanning.
- 30 2. An online multiple-choice survey with parents/carers to understand perceptions, attitudes and  
31 behaviours towards tanning both for themselves and their children.
- 32 3. An informal focus group with primary school educators to explore challenges in engaging with  
33 the school community around the Health and Well-being Area in the Curriculum for Wales.

## 35 **Discussion**

36 To date, there has been no work in Wales exploring children's, parents/carers', and educators'  
37 perceptions of tanning and how healthier attitudes can be encouraged. This study will engage with  
38 children, parents/carers, and primary school educators to scope current tanning perceptions and the  
39 perceived effects tanning has on health, to feed into future toolkit and curriculum development for  
40 health in schools in Wales and beyond.

41

## 42 Introduction

## 43 Background

44 Skin cancer, including melanoma, and non-melanoma (keratinocyte) also known as basal cell cancer  
45 (BCC) and squamous cell cancer (SCC), now comprises half of all cancers in England and Wales [1]. Yet  
46 86% of melanomas, 50-90% of BCCs and 50-70% of cutaneous SCCs can be prevented early on with safer  
47 sun habits [2]. The age-standardised incidence of keratinocyte cancer in Wales has increased by 7.1%  
48 between 2016 and 2019 – and the rate is the highest of all the UK nations [3]. Over exposure to the sun  
49 as a child can greatly increase future skin cancer risk, and with childhood being a critical time for  
50 forming, promoting and embedding lifelong health behaviours such as sun safety, establishing positive  
51 attitudes and behaviours to sun exposure during childhood has important long-term implications for  
52 attitudes and behaviours throughout life [4].

53 Sun safe behaviours also need to address sun tanning as scientists agree that there is no such thing as a  
54 ‘safe tan’. However, the general public [5], university students [6], parents [7], and children [8] generally  
55 have positive perceptions of tanned skin. In Wales, a population-based online survey reported that  
56 43.6% of respondents agreed with the statement that ‘having a suntan makes me feel healthier’ and this  
57 increased to 62.8% in the youngest age-group (<25 years). In the same survey, 44.5% of participants  
58 agreed with the statement that ‘having a tan makes me look more attractive’ [5]. These findings were  
59 also echoed in a 2017 omnibus survey reporting that 1 in 45 adults had used sunbeds in Wales and that  
60 42% did so ‘to look better’ and 25% did so ‘to feel healthier’ [2]. With the World Health Organisation  
61 classifying exposure to sunbeds as carcinogenic to humans [9], and the use of sunbeds linked with the  
62 desire for a tan, work is urgently needed to understand and address the misconceptions of the  
63 perceived health benefits of tanning.

64 To date, there has been no work in Wales exploring children and their parents'/carers' perceptions of  
65 tanning and how healthier attitudes can be encouraged and adopted from a young age. The Curriculum  
66 for Wales [10] with its designated area of learning and experience for Health and Well-being, and  
67 autonomy offered for schools in designing curriculum content, presents an ideal way to facilitate further  
68 exploration of attitudes to tanning. One of the overarching purposes of the Curriculum for Wales  
69 includes the vision that all children and young people will become healthy, confident individuals able to  
70 know how to find information and support to keep safe and well. Progress on this vision is currently  
71 made via health education in child-led 'Healthy Schools' clubs and is embedded throughout  
72 curricular/non-curricular activities. Focusing on understanding how different health dimensions, e.g.,  
73 physical, mental, emotional, and social well-being play a role in children's lives, the Health and Well-  
74 being curriculum area also supports children to incorporate healthy attitudes and behaviours, which  
75 includes improving education and behaviours around sun safety and challenging current perceptions  
76 around tanning.

77 To address some of these challenges and opportunities in Wales, we have designed the SunChat study, a  
78 mixed methods exploratory study, funded by Swansea University's Morgan Advanced Studies Institute  
79 (MASI).

## 80 **Study Aims**

- 81 • Gather data from primary school-aged children, parents/carers and primary school educators  
82 regarding perceptions of tanning and explore the perceived effects on health.
  
- 83 • Inform the development and testing of an educational toolkit for integration within the  
84 Curriculum for Wales to encourage positive health behaviours and attitudes of school children  
85 towards tanning and sun exposure.

## 86 **Study Objectives**

- 87 • To explore challenges that primary school educators face in engaging with the school  
88 community around the Health and Well-being Area of Learning and Experience in the  
89 Curriculum for Wales, specifically about healthy attitudes to tanning.
- 90 • To gather viewpoints on best ways of engaging with school-aged children (5-8 years of age) and  
91 their parents/carers about health, specifically in relation to sun tanning and sun exposure.
- 92 • To understand perceptions, attitudes and behaviours of parents/carers of primary school  
93 children in Wales regarding tanning, both for themselves and their children.
- 94 • To understand perceptions, attitudes and behaviours of school-aged children (5-8 years of age)  
95 in primary schools in Wales.
- 96 • Consolidate evidence to support the development of an educational toolkit for integration  
97 within the Curriculum for Wales.

98

## 99 **Methods**

100 SunChat is a mixed-methods exploratory study comprising 3 work streams:

- 101 1. Qualitative workshops (n=3) with groups of 5-10 children aged 5 to 8 years of age in Healthy  
102 School Clubs, to understand their perceptions of tanning and the perceived effects on health.
- 103 2. Online survey with parents/carers of primary school children to understand perceptions,  
104 attitudes and behaviours regarding tanning, both for themselves and their children.

105 3. A qualitative informal focus group with primary school educators to explore tanning  
106 perceptions/behaviours and challenges in engaging with the school community around the  
107 Health and Well-being Area of Learning and Experience in the Curriculum for Wales.  
108 Using existing networks and school partners, we will invite three primary schools in South Wales with a  
109 Healthy Schools Club to participate in the study as a case study school. Consent will be sought from each  
110 of the school's headteacher, and each school will be invited to participate in all three work streams.  
111 We received ethical approval to conduct the study from Swansea University's Medical School Research  
112 Sub-Committee (Ref 2022-0089). Study team members who will be directly involved with data  
113 collection in schools have up-to-date Disclosure and Barring Service (DBS) and valid safeguarding  
114 training allowing them to work with children.  
115 As each work stream is distinct, we elaborate on methods, consent procedures, data collection and  
116 analysis separately below.

117

## 118 **1. Workshops with Children**

119 The objective of the workshops is to understand perceptions, attitudes and behaviours towards tanning  
120 and the perceived effects on health of school-aged children (5-8 years of age) in primary schools in  
121 Wales.

### 122 **Workshop informed consent and ethical considerations**

123 Two researchers (one facilitator and one observer) will conduct the workshops with children in each  
124 case study school's Healthy Schools Club at a time convenient to the school. These clubs typically consist  
125 of 8-10 children across different year groups with an interest in health and well-being. The headteacher  
126 of each school will first send out an information sheet and consent form to each parent/carer of a

127 Healthy Schools Club child. Parents will be given 7 days to opt their child out. If a parent/carer does not  
128 give consent, that child will not be invited to participate in the workshop [11]. Workshops will be  
129 conducted in a different room to children's regular classrooms, so that children who do not have  
130 parental/carer consent to participate, will not feel excluded.

131 For those whose parents' consent, child-friendly information and consent sheets will be handed out  
132 before the workshop commences. We will approach the workshops from a children's right perspective  
133 [12], talking to children as empowered participants able to make decisions about taking part via  
134 ongoing, negotiated assent [11]. We will talk children through the informed consent process in an  
135 understandable and appropriate way and verbally confirm that they will be audio-recorded prior to  
136 beginning the workshop activities. Children will be informed of all the necessary workshop details and  
137 requirements so that they understand what will happen and that there are no right or wrong answers as  
138 everyone's knowledge and behaviour is different. School breaks will be adhered to and factored into the  
139 workshop planning. Additionally, children will be told they can have comfort and concentration breaks  
140 whenever needed. Once the child has consented to take part researchers will continuously check that  
141 children are comfortable through reading their body language. If any children look uncomfortable, they  
142 will be asked, using appropriate child-friendly language, if they are fine to continue and reminded that  
143 they can withdraw from the study at any time without giving an explanation.

## 144 **Workshop design**

145 Research design and materials for the purpose of collecting data with children is fundamental. Children's  
146 ways of expressing their views and opinions are diverse, and creative/artistic activities facilitate the  
147 communication with children that expand on spoken language [13]. We have designed 3 activities that  
148 comprise colouring, role-play, drawing, collage techniques, videos and posters to enhance children's  
149 voices. Each activity aims to encourage meaningful conversations with children and to ensure our  
150 research aims and objectives are met. In each workshop, we will conduct the following activities:

151 **Activity 1** is designed to provide an insight into how children perceive sun tanning. We will present  
152 children with an outline shape of a child on paper that will be referred to as ‘a little friend’. Children will  
153 be given ‘skin-colour’ crayons that encompass all skin colour shades inclusively and we will ask  
154 participants to colour their ‘little friend’ in. We will then read a short script to children and will invite  
155 them to think of this ‘little friend’ after playing outdoors or going on holiday. Children will be given a  
156 new blank ‘little friend’ to colour in now that the ‘friend’ has just returned from holidays or being  
157 outdoors. The researchers will assist children if needed, engaging them in conversations and prompting  
158 them to explore children’s perceptions to identify if the skin-colour of the ‘little friend’ has changed  
159 after being outdoors or on holidays, and why. Other prompt questions will explore their thoughts about  
160 perceived beauty standards associated with being tanned and if the children relate this to healthy  
161 habits. The prompt questions below will be used during the activity:

162 *-How our little friend looks before playing on the beach, the park..., on a summer day?*

163 *-And how they look after, when they are back home, indoors?*

164 *-Is there any difference? Do they look the same?*

165 *-Why did you choose this colour (same or different)?*

166 *-Is your little friend tanned?*

167 *-Do they look pretty? (Show them the first figure; and then the second figure) Depending on answers,*  
168 *why do they look pretty?*

169 *-Who looks healthier? (Show them the first figure; and then the second figure) Depending on answers,*  
170 *why do they look healthier?*

171 *-Does your little friend (dis-)like to be tanned? Do you know why?*

172 *-Is there anything you (dis-)like about tanning? What? Why?*

173

174 Researchers will use inclusive language that embraces ethnic diversity to discuss skin colour after



175 tanning. All questions that researchers will ask associated with perceived beauty standards will solely be  
176 oriented to being ‘tanned’ or ‘untanned’.

177 **Activity 2** will gather data to understand what healthy habits children already know about how to stay  
178 safe in the sun. In this activity we will use different materials laid out centrally on a classroom table for  
179 children to access easily and will invite them to draw a picture of themselves doing their favourite  
180 activities in the sun on their own or with their family, friends or pets. Children can also choose images  
181 and cut-outs from magazines with a range of items or clothing related to sun safety to glue on their  
182 drawing (collage). The researcher will also assist children to set the scene, prompting them with  
183 questions such as “What do they love doing in the sun?” and “What do they need to enjoy the sun  
184 safely?”.

185 Children will then be invited to watch a short video with a story about sun safety, and they will be given  
186 time to consider if they would like to add something to their drawings after watching the video to  
187 protect themselves, friends, pets, and their families from the sun.

188 **Activity 3** is designed to meet the overall aim of encouraging healthy behaviours and to promote sun  
189 safety. In this activity, children will be helping other children to promote sun safety and healthy habits  
190 and learn why it is healthier not to tan on purpose. We will invite children to work in groups to draw,  
191 use images and cut-outs or write down things that are healthy/safe and things are unhealthy/unsafe to  
192 do in the sun to be placed on a large poster. We will guide children in a conversation within the group  
193 related to healthy and unhealthy habits; sun safety and unsafe behaviours and will let them decide what  
194 goes in one of two columns on the poster under the headings “YES” (healthy/safe) or “NO”  
195 (unhealthy/unsafe), based on discussions which will take place during Activity 2.

196 Researchers will again assist children and facilitate discussions with them around healthy/unhealthy  
197 habits and bring in points raised in Activity 2. During the activity, researchers will encourage children to

198 think about their own sun safety and healthy behaviours and what they believe is a healthy approach to  
199 sun safety.

## 200 **Workshop data collection, management and analysis**

201 All workshop data will be audio recorded for later transcription by a secure third-party transcription  
202 service. Any names mentioned in the audio recordings will be redacted from the final anonymised  
203 transcripts. The observer will record detailed observation field notes regarding children's perceptions to  
204 tanning and the relation to health benefits and interactions amongst participants. Pictures of resources  
205 developed in the activities with children will be taken and subsequently anonymised before used in the  
206 data analysis.

207 Data collected on paper and completed workshop resources will be kept in a locked filing cabinet with  
208 restricted access to approved members of the research team only. Electronic data and scanned copies  
209 will be held securely on Swansea University servers which are subject to physical, electronic, and  
210 managerial procedures to safeguard and secure the information collected.

211 We will explore differences between perceptions, attitudes and reported behaviours towards tanning to  
212 identify whether there are any differences between knowledge and healthy practices from each of the  
213 activities. We will use NVivo12, an online qualitative data analysis software package to analyse  
214 workshop transcripts and children's outputs using thematic analysis following the recommended 6 step  
215 process: familiarisation; coding; generating themes; reviewing themes; defining and naming themes and  
216 writing up [14]. We will analyse the resources and pictures children create during the workshop using  
217 content analysis. [15].

218 Archiving will be conducted following Swansea Trials Unit Standard Operating Procedures (SOPs). All  
219 data will be held in archive for a period of 5 years following the completion of the project.

220

## 221        **2. Online parent/carer survey**

222        The objective of the online survey is to help understand current perceptions, attitudes and behaviours  
223        of parents/carers of primary school children in Wales regarding tanning, both for themselves and their  
224        children.

### 225        **Survey informed consent and ethical considerations**

226        Parent/carers who access the survey will be introduced to the survey in a short introduction text and  
227        directed to an online participant information sheet with full details about the survey and data protection  
228        which they are able to download and read in their own time. If the parent/carer is happy to continue,  
229        they will progress through the survey using the clear online navigation buttons. Due to the low-risk  
230        nature of participation, consent for survey completion will be assumed if the parent/carer completes the  
231        survey and the response is submitted. Respondents will be instructed that they do not have to complete  
232        the survey and can close out the survey at any time if they wish to withdraw and their answers will not  
233        be recorded. There will be an estimated time for completion provided within the survey introduction  
234        text along with contact details of key researchers on the study for any questions or to raise concerns.

### 235        **Survey design**

236        We will scope the current literature and collate various questions about beliefs and perceptions of  
237        tanning from similar surveys available from published sun safety research [17-19] and adapt/include  
238        them in an online survey to be designed using the Swansea University approved JISC platform for online  
239        surveys.

240        We will collect basic demographic data such as location, job role and gender of survey respondents.  
241        Respondents will also be asked the age of their eldest child in primary school and their child's year

242 group, and asked to indicate their self-assessed skin colour using the Fitzpatrick skin colour scale [20].

243 The survey will include Likert scale type questions (strongly agree to strongly disagree) related to how

244 healthy and/or attractive they feel a tan looks on themselves and their child along with how

245 positively/negatively they feel their child thinks about tanning. We will ask about habits that the

246 respondents and their child have when outside in the sun.

247 Survey advertisements will be created and ethically approved to help disseminate the survey links and

248 QR codes which can be scanned using an eligible smartphone for direct access to the survey. All survey

249 materials including the information sheets, advertisements and the survey itself will be available in both

250 English and Welsh.

251 The survey links and QR codes will be distributed using several pathways in an attempt to reach as wide

252 a variety of parents/carers as possible including a mix of genders, ethnicities, ages, number of children

253 and professions as long as they have at least one child of primary school age. Firstly, we will distribute

254 the survey to our case study schools to disseminate to parents of their enrolled pupils. We will then look

255 to promote the survey publicly using other methods of circulation such as promotion on social media

256 and University email lists. Survey advertisements will also be uploaded to public websites including

257 Swansea University webpages and via social media, including making use of the paid advertisement

258 feature to reach a wider, specific audience. We will ask current contacts in Health and Care Research

259 Wales and the charity, Tenovus Cancer Care, to promote the survey link on their social media pages.

260 Finally, we will post the link on relevant parent and carer online forums. We will record all survey

261 promotion activities on a designated bespoke survey launch plan designed for the study.

262 Eligibility will be self-reported by the parent/carers using a screening question asking if the respondent

263 has at least one child of primary school age. Anyone who responds “no” to this question will not be able

264 to continue. Parents who have multiple children of primary school age will be asked to consider their

265 responses thinking about their eldest child. Although we will aim to capture respondents from Wales,  
266 public dissemination of the link will mean that anyone able to click on the link will be able to complete  
267 the survey, so the respondent will be asked to select their location from a pre-defined list.

268 We will aim to receive as many survey responses as possible and will not enforce an upper limit on the  
269 number of survey responses we will accept.

### 270 **Survey data collection, management and analysis**

271 Survey data will be entered directly onto the JISC Online Survey platform by respondents and will be  
272 held centrally throughout active data collection. JISC is a highly secure survey platform which is a GDPR  
273 compliant, online survey tool designed for academic research, education, and public sector  
274 organisations, certified to ISO 27001. JISC also provides daily back-ups for all data collected within  
275 online surveys. All user accounts on JISC Online Surveys are password protected and unique to the  
276 individual.

277 We will analyse data in an accepted statistical software package using simple statistics, such as  
278 measures of distribution means, cross tabulations, and tests of association such as t-tests for continuous  
279 variable and Pearson's chi square for categorical variables. We will analyse free text responses using  
280 thematic analysis in NVivo following the recommended 6 step process: familiarisation; coding;  
281 generating themes; reviewing themes; defining and naming themes and writing up [14]. Two  
282 researchers who have qualitative analysis experience will conduct the thematic analysis.

283 Survey data will be archived following Swansea Trials Unit SOPs. All data will be held in archive for a  
284 period of 5 years following the completion of the project.

285

### 286 **3. Primary school educator focus group**

287 The objective of the focus group is to explore the challenges that primary educators face in engaging  
288 with the school community around the Health and Well-being Area of Learning and Experience in the  
289 Curriculum for Wales, specifically about healthy attitudes to tanning, and to gather viewpoints on best  
290 ways of engaging with school-aged children (5-8 years of age) and their parents/carers about health,  
291 specifically in relation to sun tanning and sun exposure.

## 292 **Focus group informed consent and ethical considerations**

293 Head teachers from our case study schools will share information about the focus group to their school  
294 educators who will be invited to submit an expression of interest to take part. Researchers will follow up  
295 with potential participants to provide information about the consent process and to receive written  
296 consent from participants. Focus groups will be conducted at a suitable time to maximise availability  
297 options for participants, with consideration of school schedules and hours. Participants will be given the  
298 opportunity to ask any questions before beginning the focus group and reminded that they will be audio  
299 recorded for transcription purposes. Researchers will also remind all participating members how long  
300 the discussion is likely to take, that they are not obliged to answer any questions they do not wish to,  
301 and that participation is optional so they may withdraw at any time without giving an explanation.  
302 Facilitators will also offer comfort breaks if or when they are needed.

## 303 **Focus group design**

304 The focus group will be conducted online using video conferencing software. We will create a semi-  
305 structured topic guide with discussion points on opinions about providing tanning education for primary  
306 school children and what the current awareness is about tanning in their schools. We will also cover  
307 opinions about how to best promote the message of safer sun exposure and tanning and if there would  
308 be any limitations or challenges delivering this awareness in primary school children. Researchers will

309 conduct the focus group in line with focus group facilitation guidance, which will be given to participants  
310 before commencing any discussions to ensure that everyone has an opportunity to contribute equally  
311 and there is no overtalking. Two focus group facilitators will be present to guide and encourage  
312 discussions and to ensure that participants feel comfortable sharing their opinions and current practices  
313 in their schools. We will offer consented participants the choice of conducting the focus group in English  
314 or Welsh.

### 315 **Focus group data collection, management and analysis**

316 We will audio record the focus group with participant consent and will have the recordings transcribed  
317 by a secure third-party transcription service, without identifying participants. The transcripts will be  
318 checked and confirmed as accurate prior to analysis. Identifying data, including informed consent forms  
319 and audio recordings, will be held electronically in a secure folder with restricted access on Swansea  
320 University servers which are subject to physical, electronic, and managerial procedures to safeguard and  
321 secure the information collected.

322 We will analyse the data to identify key themes around tanning, and challenges around the Health and  
323 Well-being Area of Learning and Experience for primary school educators. Again, we will use NVivo to  
324 handle qualitative analysis and will perform thematic analysis following the recommended 6 step  
325 process: familiarisation; coding; generating themes; reviewing themes; defining and naming themes and  
326 writing up [14].

327 As with all data collected, archiving will be conducted following Swansea Trials Unit SOPs. All data will be  
328 held in archive for a period of 5 years following the completion of the project.

329

### 330 **Impact and dissemination**

331 To enable dissemination of study results in an accessible way which can be understood by children, a

332 collaborative infographic poster will be designed to showcase schools' and children's involvement in the  
333 workshops. Children will be informed that the poster will be used publicly and that they will not be  
334 identified from any poster content. Survey results will also be collated into a lay-person friendly format,  
335 highlighting key findings. Results from this collaborative study will also be used to inform development  
336 and testing of an educational toolkit to encourage children's healthy behaviours towards tanning and  
337 sun exposure as part of future work. Further findings from all workstreams will be written up for  
338 publications in suitable journals.

339 We will design a SunChat webpage hosted on a Swansea University website to promote real-time study  
340 news and provide public updates of the study progress. Video logs (vlogs) will also be created and  
341 uploaded online to provide lay-friendly updates and public insights into study activities over the study  
342 lifetime.

343

## 344 **Patient and Public Involvement**

345 Parent/carer involvement in all aspects of the study design will be considered crucial for aligning with  
346 study aims in an appropriate way, the success of data collection and maximising the resulting impact of  
347 the study and when looking towards informing and developing the educational toolkit. We will be  
348 guided by the UK standards for public involvement [21] and endeavour to meet the standards at every  
349 opportunity presented while collaborating with public representatives.

350

351 Drafts of the study online survey will be reviewed by a parent representative who has child(ren) of a  
352 primary school age for appropriateness/relevance of survey questions, length of time to complete and  
353 layout/design choices. Our representative will also help to test the final survey against criteria such as  
354 user acceptance, screen testing and confirming the survey works as expected. Training which is



355 determined as necessary to conduct any study tasks which may fall outside of the current skills of our  
356 representative will be provided by members of the project team, including but not limited to  
357 introductory project meetings, ongoing support with project team requests and protocol training. All  
358 feedback will be considered and incorporated where feasible into the survey, and updates will be made  
359 to the final version using parent/carer feedback. Our parent/carer representative will also aid in  
360 circulating the survey link to their peers, their children's school and social media and provide invaluable  
361 advice about how to best reach out to parents/carers with our survey. Our parent/carer representative  
362 will be appropriately reimbursed according to current recommendations for public involvement  
363 payments for their time and any expenses incurred as part of their involvement. Finally, we will look to  
364 include our representative in study dissemination activities, such as forwarding on publications and lay  
365 friendly study outputs to their social groups and seeking advice for key findings they determine as  
366 important to highlight in results summaries.

367

## 368 **Discussion**

369 With skin cancer an issue in Wales and beyond, rising rates will not only continue to effect health and  
370 well-being but will overburden NHS dermatology services and care for other skin conditions, affecting  
371 future use of services for today's children. As suggested by an Australian study [22], the implementation  
372 of public health prevention programmes show relevant health and economic cost benefits to reduce  
373 skin cancer burden. Developing and embedding positive health-related behaviours including healthy  
374 attitudes to tanning should begin in childhood, and these years give the ideal opportunity for children to  
375 develop prevention strategies [23]. One study [4] suggests that prevention strategies and healthy  
376 behaviours implemented during teenage years may be too late and not as effective due to tanning being  
377 considered 'attractive' by adolescents, so recommend that it is more beneficial to encourage healthier  
378 behaviours during the formative years of life.

## 379 **Study strengths**

380 This study addresses the community impact of a public health issue with ongoing education strengths in  
381 Wales, specifically, by building on the innovative and holistic education process proposed in the  
382 Curriculum for Wales with statutory focus on Health and Well-being. As part of the study data collection,  
383 we take the known problem of skin cancer and address it in a novel way by engaging directly with  
384 children through creative activities identified as best practice in facilitating and prioritising their  
385 participation [24]. Also, creative and artistic approaches are known as young children's preferred ways  
386 of communicating their views, thoughts and opinions [25]. As academics that do research with school-  
387 aged children, it is our responsibility to explore children's perceptions in ways that facilitate their open  
388 communication, and ensuring their voices are heard. Workshops at schools which will include activities  
389 that use child-friendly methodologies and appropriate language for collecting information and ensure  
390 that children's perceptions to tanning are listened and analysed, and then addressed e.g., through  
391 developing curriculum toolkits aligned to children's views.

392 As well as ensuring we can explore the perceptions of tanning and encourage conversations towards  
393 healthy attitudes with children, school educators, and families, this study will also create opportunities  
394 for continued inter-disciplinary collaboration between health and education academics. The study has  
395 the potential to lead into further research where we would look to evaluate our toolkit and future  
396 curriculum development for schools on questioning perceptions of tanning and the effects on young  
397 children's health and well-being, aligned to the views of children themselves. Taking responsibility for  
398 health-related behaviours including attitudes to tanning should begin in childhood, and hence is the  
399 ideal opportunity for children to develop prevention strategies.

## 400 **Study limitations**

401 Due to time and budget constraints, we are limited to inviting case study schools in the Swansea area in  
402 South Wales. Further representation is needed from more primary schools in Wales from varying  
403 locations and demographical backgrounds to provide a clearer picture of the situation around tanning  
404 beliefs in children and their parents/carers/educators. Researchers on the study team will incorporate  
405 this requirement into the design of a potential larger-scale study in the future to include participants  
406 from across the UK to ensure that future participants better represent those from demographically  
407 diverse populations. However, the online survey for this study can be distributed widely to all parents in  
408 Wales using many types of avenues for dissemination and we therefore hope to receive responses from  
409 a diverse range of parents/carers.

410 We hope that by sharing this protocol, we can help raise awareness of the importance of challenging  
411 and changing the prevailing assumption that having a tan is desirable and support schools in  
412 empowering and educating children to become healthy and informed adults.

413

## 414 **Acknowledgments**

415 We want to acknowledge the Morgan Advanced Studies Institute (MASI) at Swansea University for  
416 funding this important exploratory study. We would also like to acknowledge all participants and  
417 collaborators including the children, parents/carers and primary school teachers who will provide the  
418 data needed for this research and have given up their valued time to contribute to the study.

419

## 420 References

- 421 1. Levell N. GIRFT Programme National Specialty Report [Internet]. NHS; 2021 Aug. Available from:  
422 [https://cdn.bad.org.uk/uploads/2022/05/06132904/DermatologyReport-Sept21o-FINAL-](https://cdn.bad.org.uk/uploads/2022/05/06132904/DermatologyReport-Sept21o-FINAL-15.9.21-3.pdf)  
423 [15.9.21-3.pdf](https://cdn.bad.org.uk/uploads/2022/05/06132904/DermatologyReport-Sept21o-FINAL-15.9.21-3.pdf)
- 424 2. Lucas RM, McMichael AJ, Armstrong BK, Smith WT. Estimating the global disease burden due to  
425 ultraviolet radiation exposure. International Journal of Epidemiology [Internet]. 2008 Feb  
426 14;37(3):654–67. Available from: <https://pubmed.ncbi.nlm.nih.gov/18276627/>
- 427 3. Non-Melanoma Skin Cancer Incidence in Wales, 2016-2019 [Internet]. Public Health Wales; 2023  
428 [cited 2023 Sep 4]. Available from:  
429 [https://publichealthwales.shinyapps.io/nmsc\\_incidence\\_wales\\_2016\\_2019/](https://publichealthwales.shinyapps.io/nmsc_incidence_wales_2016_2019/)
- 430 4. Dadlani C, Orlow SJ. Planning for a brighter future: a review of sun protection and barriers to  
431 behavioral change in children and adolescents. Dermatology Online Journal [Internet]. 2008 Sep  
432 15;14(9):1. Available from: <https://pubmed.ncbi.nlm.nih.gov/19061583/>
- 433 5. Ziaj S, Tseliou F, Datta D, Abbott RA. Skin cancer awareness and prevention behaviour in Wales.  
434 British Journal of Dermatology [Internet]. 2020 Dec 23;184(4):764–5. Available from:  
435 <https://orca.cardiff.ac.uk/id/eprint/144458/1/bjd.19676.pdf>
- 436 6. Kirk L, Greenfield S. Knowledge and attitudes of UK university students in relation to ultraviolet  
437 radiation (UVR) exposure and their sun-related behaviours: a qualitative study. BMJ Open  
438 [Internet]. 2017 Mar 1;7(3):e014388. Available from:  
439 <https://bmjopen.bmj.com/content/7/3/e014388>
- 440 7. Gefeller O, Li J, Uter W, Pfahlberg A. The Impact of Parental Knowledge and Tanning Attitudes  
441 on Sun Protection Practice for Young Children in Germany. International Journal of

- 442 Environmental Research and Public Health [Internet]. 2014 May 5;11(5):4768–81. Available  
443 from: <https://www.ncbi.nlm.nih.gov/pmc/articles/PMC4053880/>
- 444 8. McAvoy, H, Rodriguez, L, Költő, A and NicGabhainn, S. (2020) Children’s exposures to ultraviolet  
445 radiation - a risk profile for future skin cancers in Ireland. Institute of Public Health in Ireland.
- 446 9. World Health Organisation. Artificial tanning devices: Public health interventions to manage  
447 sunbeds. 2017.
- 448 10. Curriculum for Wales [Internet]. Gov.wales. [cited 2023 Jul 1]. Available from:  
449 <https://hwb.gov.wales/curriculum-for-wales>
- 450 11. Ethical Guidelines for Educational Research, fourth edition (2018) [Internet]. Bera.ac.uk. [cited  
451 2018 Jun 20]. Available from: [https://www.bera.ac.uk/publication/ethical-guidelines-for-](https://www.bera.ac.uk/publication/ethical-guidelines-for-educational-research-2018-online)  
452 [educational-research-2018-online](https://www.bera.ac.uk/publication/ethical-guidelines-for-educational-research-2018-online)
- 453 12. The right way - A children’s rights approach - Children’s commissioner for wales [Internet].  
454 Children’s Commissioner for Wales. 2021 [cited 2017 3]. Available from:  
455 <https://www.childcomwales.org.uk/resources/the-right-way-a-childrens-rights-approach/>
- 456 13. Blaisdell C, Arnott L, Wall K, Robinson C. Look Who’s Talking: Using creative, playful arts-based  
457 methods in research with young children. Journal of Early Childhood Research [Internet]. 2018  
458 Nov 9;17(1):1476718X1880881. Available from:  
459 <https://journals.sagepub.com/doi/10.1177/1476718X18808816>
- 460 14. Braun V and Clarke V. Using thematic analysis in psychology. Qual. Res. Psychol, 2006, 3(2):  
461 p.77-101
- 462 15. Weber, R. (1990). Techniques of content analysis. SAGE Publications, Inc.,  
463 <https://doi.org/10.4135/9781412983488>
- 464 16. Glanz K, Yaroch AL, Dancel M, Saraiya M, Crane LA, Buller DB, et al. Measures of sun exposure  
465 and sun protection practices for behavioral and epidemiologic research. Arch Dermatol

- 466 [Internet]. 2008 [cited 2023 Sep 4];144(2). Available from:  
467 <https://pubmed.ncbi.nlm.nih.gov/18283179/>
- 468 17. Buller DB, Callister MA, reichert T. (1995). Skin cancer prevention by parents of young children:  
469 health information sources, skin cancer knowledge, and sun protection practices. *Oncology*  
470 *Nursing Forum* ; 22: 1559-66
- 471 18. Morris J, McGee R, Bandaranayake M. Sun protection behaviours and the predictors of sunburn  
472 in young children. *Journal of Paediatrics and Child Health* [Internet]. 1998 Dec;34(6):557–62.  
473 Available from: <https://onlinelibrary.wiley.com/doi/abs/10.1046/j.1440-1754.1998.00307.x>
- 474 19. Thoonen K, van Osch L, Crutzen R, de Vries H, Schneider F. Identification of relevant  
475 sociocognitive determinants explaining multiple parental sun protection behaviors. *Health*  
476 *Education & Behavior*. 2021;49(3):392–404. doi:10.1177/10901981211010434
- 477 20. Fitzpatrick T. Soleil et peau. *J Méd Esthét*. 1975;(2):33–4.
- 478 21. UK Standards for Public Involvement, 2019. Accessed November 2023.  
479 <https://sites.google.com/nih.ac.uk/pi-standards/standards>.
- 480 22. Shih ST, Carter R, Heward S, Sinclair C. Economic evaluation of future skin cancer prevention in  
481 Australia. *Preventive Medicine*. 2017 Jun;99:7–12.
- 482 23. A healthier Wales: long term plan for health and social care [Internet]. GOV.WALES. 2018 [cited  
483 2023 Jul 1]. Available from: [https://www.gov.wales/healthier-wales-long-term-plan-health-and-](https://www.gov.wales/healthier-wales-long-term-plan-health-and-social-care)  
484 [social-care](https://www.gov.wales/healthier-wales-long-term-plan-health-and-social-care)
- 485 24. Farini F, Scollan A. Children’s Self-determination in the Context of Early Childhood Education and  
486 Services. Springer eBooks. Springer Nature; 2019.
- 487 25. Clark A. Listening to Young Children, Expanded Third Edition: A Guide to Understanding and  
488 Using the Mosaic Approach. Jessica Kingsley Publishers; 2017.
- 489
